# Supplementary material
Source: HighWire-hosted journal article supplement (https://jnm.snmjournals.org/highwire/filestream/94951/field_highwire_adjunct_files/0/170530_Supplemental_Data.pdf)
Supplement: 170530_Supplemental_Data.pdf [file 170530_Supplemental_Data.pdf]

### Quality control

For instant thin layer chromatography (iTLC) analysis, 2  $\mu\text{L}$  of the product solution were applied onto an iTLC-SA strip (Varian, USA, 10 x 1 cm) and developed with citrate buffer (0.1 M, pH 5). The percentage of free  $^{111}\text{In}$  (retention factor  $R_f=1.0$ ) and radiolabeled compound ( $R_f=0.0-0.1$ ) in the product was determined using a Minigita TLC scanner with Gina Star TLC software (Raytest, Germany).

For high performance liquid chromatography (HPLC) an Agilent Technologies system (USA) was used. 10  $\mu\text{L}$  of the product solution were injected onto an Aeris PEPTIDE 3.6  $\mu\text{m}$  XB-C18 column; 100 x 4.6 mm (Phenomenex, Germany). Eluent A: MeCN, 0.1 % trifluoroacetic acid (TFA), Eluent B: H<sub>2</sub>O, 0.1 % TFA (A/B: 1/100), flow rate 0.8 ml/min; detector: GABI (Raytest, Germany), DAD 254 nm. Retention times  $R_t$  for  $^{111}\text{In}$ -labeled compounds were 9.5-9.9 min, while free  $^{111}\text{In}$  eluted with the dead volume ( $R_t=1.1$  min).

**SUPPLEMENTAL TABLE 1.** Tissue uptake and tumor-to-normal tissue ratios of <sup>111</sup>In-3BP-227 in female nude mice grafted with NTR1-positive HT29 cells and NTR1-negative HEK293 cells, respectively.

|                 | HT29              |                 |                 |                 | HEK293        |
|-----------------|-------------------|-----------------|-----------------|-----------------|---------------|
|                 | 3h p.i. n=6       | 6h p.i. n=7     | 12h p.i. n=9    | 24h p.i. n=9    | 12h p.i. n=3  |
| Tumor           | 7,49 ± 2,94       | 8,35 ± 3,12     | 6,82 ± 2,38     | 2,32 ± 1,28     | 0,64 ± 0,58   |
| Heart           | 1,07 ± 0,31       | 0,35 ± 0,19     | 0,42 ± 0,37     | 0,12 ± 0,07     | 0,18 ± 0,03   |
| Lungs           | 1,63 ± 0,73       | 0,54 ± 0,24     | 0,58 ± 0,47     | 0,37 ± 0,27     | 0,25 ± 0,08   |
| Kidney          | 2,49 ± 0,42       | 1,73 ± 0,61     | 2,22 ± 1,06     | 1,37 ± 0,67     | 1,47 ± 0,38   |
| Liver           | 1,30 ± 0,19       | 0,78 ± 0,24     | 1,06 ± 0,65     | 0,91 ± 0,82 n=8 | 0,67 ± 0,12   |
| Spleen          | 0,60 ± 0,25       | 0,27 ± 0,15     | 0,46 ± 0,28     | 0,25 ± 0,17 n=8 | 0,34 ± 0,11   |
| Stomach*        | 1,45 ± 1,92       | 0,28 ± 0,23     | 0,36 ± 0,45     | 0,13 ± 0,09     | 0,11 ± 0,03   |
| Intestine*      | 1,02 ± 0,23       | 0,46 ± 0,15     | 0,37 ± 0,26     | 0,12 ± 0,04     | 0,17 ± 0,03   |
| Adipose tissue  | 0,67 ± 0,03 n=2   | 0,20 ± 0,06 n=3 | 0,13 ± 0,05 n=3 | 0,22 ± 0,19 n=6 | 0,21 ± 0,05   |
| Urinary bladder | 1,01 ± 0,05 n=2   | 0,47 ± 0,10 n=3 | 0,26 ± 0,02 n=3 | 0,24 ± 0,22 n=6 | 0,49 ± 0,09   |
| Muscle          | 0,45 ± 0,18       | 0,21 ± 0,12     | 0,25 ± 0,20     | 0,07 ± 0,04     | 0,12 ± 0,04   |
| Bone            | 0,71 ± 0,26       | 0,29 ± 0,10     | 0,33 ± 0,20     | 0,16 ± 0,09     | 0,19 ± 0,02   |
| Brain           | 0,09 ± 0,02       | 0,04 ± 0,02     | 0,09 ± 0,16     | 0,03 ± 0,01     | 0,03 ± 0,003  |
| Blood           | 2,54 ± 1,31       | 0,46 ± 0,22     | 0,22 ± 0,19     | 0,05 ± 0,03     | 0,05 ± 0,02   |
| Urine           | 11,33 ± 12,37 n=3 | 8,12 ± 6,85 n=6 | 2,71 ± 2,75 n=8 | 0,91 ± 0,94 n=8 | 0,63 ± 0,46   |
| Tumor/blood     | 3,75 ± 2,47       | 20,91 ± 9,45    | 58,75 ± 43,85   | 58,95 ± 56,55   | 16,81 ± 15,07 |
| Tumor/liver     | 5,97 ± 2,82       | 11,05 ± 3,64    | 7,89 ± 3,72     | 4,58 ± 4,81 n=8 | 1,10 ± 1,19   |
| Tumor/muscle    | 20,06 ± 13,27     | 47,82 ± 21,35   | 41,33 ± 26,34   | 39,48 ± 30,25   | 6,61 ± 7,10   |
| Tumor/kidney    | 3,18 ± 1,48       | 5,13 ± 1,36     | 3,36 ± 1,12     | 2,05 ± 1,35     | 0,50 ± 0,56   |

**Uptake is expressed as mean percentage of injected dose per gram of tissue (%ID/g) ± SD.** If sample size n of a single tissue differs from the number given in the column header, it is additionally listed. \*Organs with their content.

**SUPPLEMENTAL TABLE 2.** Tissue uptake and tumor-to-normal tissue ratios of  $^{111}\text{In}$ -3BP-228 in female nude mice grafted with NTR1-positive HT29 cells.

|                 | 3h p.i. n=6     | 6h p.i. n=9     | 12h p.i. n=6    | 24h p.i. n=5    |
|-----------------|-----------------|-----------------|-----------------|-----------------|
| Tumor           | 10,2 ± 5,28     | 8,04 ± 5,04     | 6,19 ± 4,02     | 0,80 ± 0,21     |
| Heart           | 1,13 ± 0,96     | 0,20 ± 0,07     | 0,10 ± 0,03     | 0,01 ± 0,01     |
| Lungs           | 3,35 ± 2,44     | 0,39 ± 0,20     | 0,52 ± 0,36     | 0,12 ± 0,14     |
| Kidney          | 1,49 ± 0,90     | 0,47 ± 0,12     | 0,37 ± 0,14     | 0,16 ± 0,03     |
| Liver           | 1,18 ± 0,43     | 0,54 ± 0,06     | 0,49 ± 0,13     | 0,42 ± 0,24     |
| Spleen          | 1,04 ± 0,48     | 0,33 ± 0,18     | 0,24 ± 0,13     | 0,06 ± 0,05     |
| Stomach*        | 0,56 ± 0,30     | 0,67 ± 1,35     | 0,13 ± 0,11     | 0,02 ± 0,01     |
| Intestine*      | 0,85 ± 0,36     | 0,42 ± 0,35     | 0,22 ± 0,20     | 0,06 ± 0,04     |
| Adipose tissue  | 2,00 ± 1,38 n=3 | 0,21 ± 0,21 n=6 | 0,17 ± 0,04 n=3 | NA              |
| Urinary bladder | 4,43 ± 2,66 n=3 | 0,70 ± 0,80 n=6 | 0,50 ± 0,16 n=3 | NA              |
| Muscle          | 0,34 ± 0,24     | 0,10 ± 0,06     | 0,04 ± 0,02     | 0,02 ± 0,01     |
| Bone            | 0,60 ± 0,37     | 0,16 ± 0,05     | 0,12 ± 0,05     | 0,04 ± 0,01     |
| Brain           | 0,08 ± 0,04     | 0,02 ± 0,01     | 0,02 ± 0,01     | 0,01 ± 0,01     |
| Blood           | 2,01 ± 0,96     | 0,23 ± 0,11     | 0,09 ± 0,02     | 0,11 ± 0,20     |
| Urine           | 5,64 ± 8,81 n=4 | 5,59 ± 4,45 n=7 | 1,43 ± 0,86     | 0,25 ± 0,18 n=3 |
| Tumor/blood     | 5,47 ± 2,50     | 46,6 ± 38,1     | 67,4 ± 35,9     | 44,4 ± 42,0     |
| Tumor/liver     | 8,70 ± 3,20     | 14,7 ± 9,16     | 14,7 ± 13,6     | 2,70 ± 2,02     |
| Tumor/muscle    | 34,3 ± 12,1     | 103,0 ± 92,9    | 148,0 ± 85,2    | 47,4 ± 26,5     |
| Tumor/kidney    | 7,75 ± 3,78     | 16,6 ± 9,48     | 15,9 ± 7,39     | 5,16 ± 1,10     |

**Uptake is expressed as mean percentage of injected dose per gram of tissue (%ID/g) ± SD.** If sample size n of a single tissue differs from the number given in the column header, it is additionally listed. \*Organs with their content.

**SUPPLEMENTAL TABLE 3.** Tissue uptake and tumor-to-normal tissue ratios of <sup>111</sup>In-3BP-483 in female nude mice grafted with NTR1-positive HT29 cells.

|                 | 3h p.i. n=3     | 6h p.i. n=5     | 12h p.i. n=5    | 24h p.i. n=6 |
|-----------------|-----------------|-----------------|-----------------|--------------|
| Tumor           | 1,90 ± 0,82     | 1,63 ± 0,54     | 0,9 ± 0,38      | 0,79 ± 0,36  |
| Heart           | 0,07 ± 0,02     | 0,06 ± 0,02     | 0,05 ± 0,01     | 0,04 ± 0,01  |
| Lungs           | 0,20 ± 0,01     | 0,21 ± 0,04     | 0,13 ± 0,04     | 0,11 ± 0,06  |
| Kidney          | 2,62 ± 0,30     | 2,73 ± 0,78     | 3,03 ± 1,16     | 2,18 ± 0,67  |
| Liver           | 0,24 ± 0,02     | 0,22 ± 0,05     | 0,21 ± 0,06     | 0,21 ± 0,09  |
| Spleen          | 0,11 ± 0,04     | 0,12 ± 0,04     | 0,09 ± 0,03     | 0,09 ± 0,02  |
| Stomach*        | 0,05 ± 0,02     | 0,10 ± 0,10     | 0,07 ± 0,07     | 0,07 ± 0,08  |
| Intestine*      | 0,21 ± 0,05     | 0,25 ± 0,23     | 0,09 ± 0,03     | 0,12 ± 0,15  |
| Adipose tissue  | 0,05 ± 0,01 n=2 | 0,13 ± 0,08     | 0,08 ± 0,02     | 0,08 ± 0,02  |
| Urinary bladder | 0,19 ± 0,03     | 0,18 ± 0,06 n=4 | 0,2 ± 0,17      | 0,23 ± 0,15  |
| Muscle          | 0,08 ± 0,04     | 0,05 ± 0,01     | 0,03 ± 0,01     | 0,03 ± 0,01  |
| Bone            | 0,18 ± 0,18     | 0,10 ± 0,01     | 0,08 ± 0,03     | 0,07 ± 0,03  |
| Brain           | 0,01 ± 0,01     | 0,01 ± 0,01     | 0,01 ± 0,01     | 0,01 ± 0,01  |
| Blood           | 0,06 ± 0,02     | 0,02 ± 0,01     | 0,01 ± 0,01     | 0,01 ± 0,01  |
| Urine           | 9,19 ± 5,04     | 1,35 ± 0,85 n=4 | 1,66 ± 1,83 n=4 | 0,43 ± 0,22  |
| Tumor/blood     | 29,8 ± 8,18     | 81,4 ± 27,2     | 81,9 ± 41,5     | 149 ± 98,7   |
| Tumor/liver     | 7,66 ± 2,77     | 7,17 ± 1,31     | 4,57 ± 2,30     | 4,03 ± 2,81  |
| Tumor/muscle    | 23,5 ± 2,44     | 35,8 ± 12,2     | 30,6 ± 21,2     | 31,8 ± 20,9  |
| Tumor/kidney    | 0,71 ± 0,26     | 0,6 ± 0,08      | 0,31 ± 0,14     | 0,35 ± 0,18  |

**Uptake is expressed as mean percentage of injected dose per gram of tissue (%ID/g) ± SD.** If sample size n of a single tissue differs from the number given in the column header, it is additionally listed. \*Organs with their content.
